# Supplementary material for: Relicts of Threatened Biodiversity: Similarities and Differences among the 7230 EU Habitat Plant Communities on Montane Plateaus of Central Apennines, Italy
Source: MDPI journal article supplement (doi:10.3390/plants13101282), 2024-05-07
Supplement: s1 [file s1]

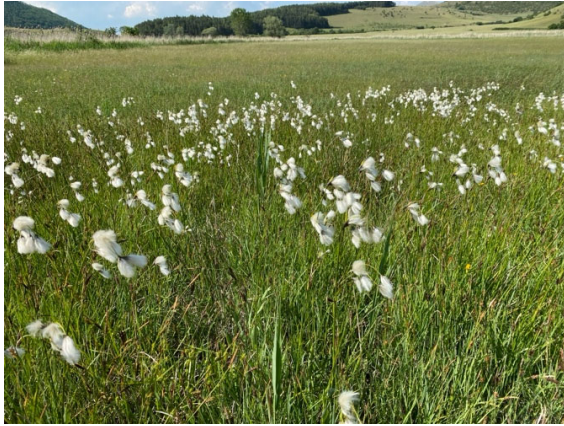

Figure S1: *Eriophorum latifolium* community.

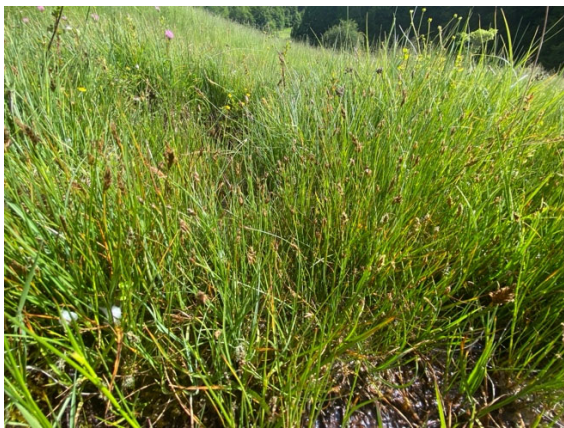

Figure S2: *Caricetum davallianae*.

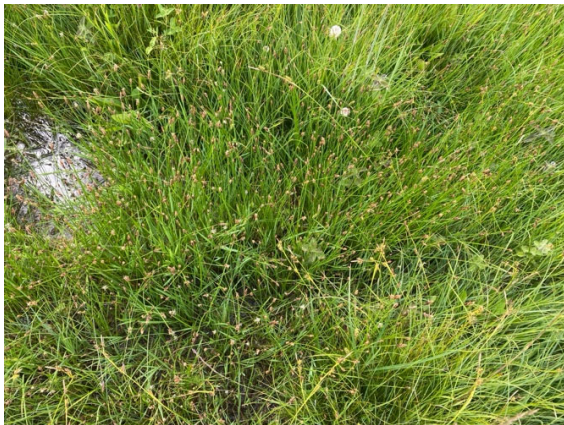

Figure S3: *Eleocharitetum quinqueflorae*.

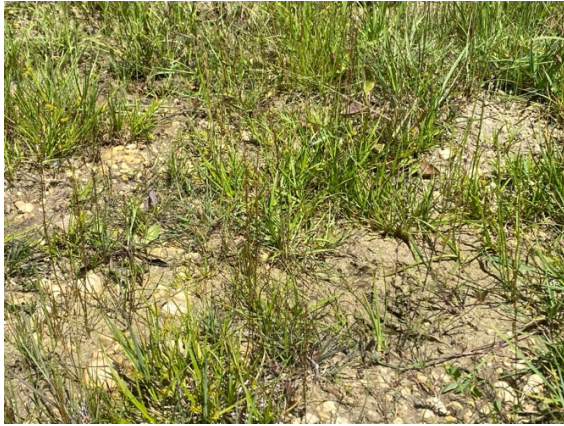

Figure S4: *Eleocharitetum quinqueflorae* variant with *Triglochin palustris* and *Carex oederi*.

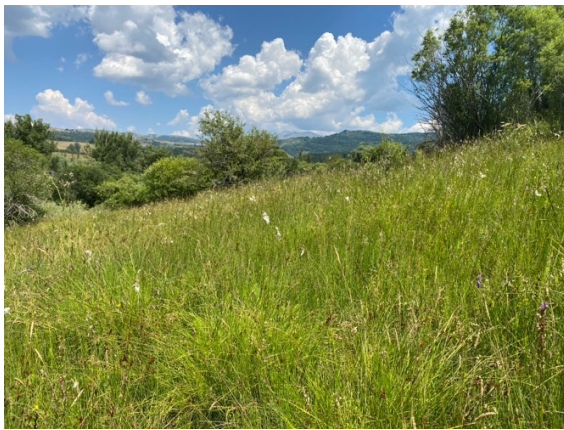

Figure S5: *Caricetum davallianae* *caricetosum hostianae*.

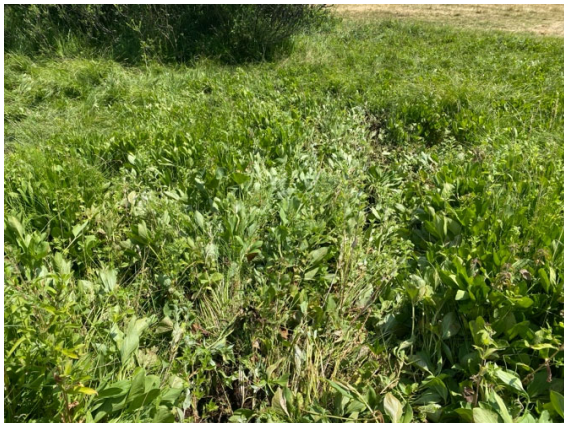

Figure S6: *Menyanthes trifoliata*.
